# Supplementary material
Source: PubMed Central journal article supplement (PMC4691685)

## **Supplemental materials and methods**

### **Supplemental Methods**

#### **Targeted sequencing**

A custom-made SureSelect oligonucleotide probe library was designed to capture the coding and flanking intronic sequences of 820 genes for different muscular disorders (MDSureSelectXT, NMD-Chip Consortium, [www.nmd.chip.eu](http://www.nmd.chip.eu)). Sample preparation, sequence capture, enrichment, and elution were performed according to the manufacturer's instructions (SureSelect, Agilent). Enriched sequences were then sequenced on a HiSeq2000 instrument (Illumina) at IntegraGen (Evry, France) and paired-end read of 100 bp length were produced. Image analysis and base calling was performed using Illumina Real Time Analysis Pipeline version 1.10 with default parameters. The Burrows-Wheeler algorithm was applied to align sequence reads to the UCSC Genome Browser hg19 version of the human genome and variants were called via the GATK software package.<sup>1</sup> The variants were filtered according to their quality, functional class (non-synonymous and/or affecting splicing), putative pathogenicity (PolyPhen-2, SIFT, OMIM) and frequency ( $\leq 1\%$  in available genomic databases: IntegraGen, 1000 Genomes, dbSNP, NHLBI Exome Sequencing Project, and Exome Variant Server).

#### **Morphological and immunofluorescence analyses**

For myofibrillar proteins analysis, we used antibodies against desmin (D33, DAKO),  $\alpha$ Bcrystallin (G2JF, Novocastra) and myotilin (RSO34, Novocastra). For titin N-ter staining (Millipore MAB1553; dilution 1:10), tissue sections were fixed twice 10 min in 100% acetone at 4°C and incubated with the primary and then secondary antibodies (1:500, Cy3 conjugated goat anti-mouse IgG, Jackson Immunoresearch). For titin C-ter studies, sections were fixed

with 4% paraformaldehyde in PBS for 10 min and blocked for 1h with 3% BSA IgG-free a room temperature. Sections were incubated with primary antibodies, rabbit anti-Titin M10-1 polyclonal (1:100) or mouse anti- $\alpha$ -actinin monoclonal (1:1000, Sigma-Aldrich A7811) and then with secondary antibodies, Alexa fluor 488 goat antirabbit (1:500, Life Technologies ) or Cy3 conjugated goat anti-mouse IgG (1:500, Jackson Immunoresearch) for 45 min at room temperature. Sections were imaged on an Axioplan 2 epifluorescence microscope (Carl Zeiss).

#### Reference

1. DePristo MA, Banks E, Poplin R, et al. A framework for variation discovery and genotyping using next-generation DNA sequencing data. *Nature genetics* 2011;43:491-498.

**Supplemental Table e-1: Primer for amplification of exons of the M-line Titin**

|                        | Upper primer               | Lower primer                             |
|------------------------|----------------------------|------------------------------------------|
| <b>Exons screening</b> |                            |                                          |
| <b>Mex1-2a</b>         | TTATTA ACTTGGGGGTGGAGG     | TGCTTTCAAATGATTCATGGAG                   |
| <b>Mex1-3b</b>         | TGGAATTGTCCATCGTTGTG       | CCTCCTTCTTCACCAACTGC                     |
| <b>Mex1-4c</b>         | GCAATTCGATCTCAGAAGGG       | GGACAGTGGCTGACCATCTT                     |
| <b>Mex1-5</b>          | TACTGGCAAATGCAGAATGC       | CTCTTCTTCAAGACGCAGCC                     |
| <b>Mex1-6d</b>         | GAGATAGTGAGACCAGCCCG       | TGAAAGGCTGCTGACTCAA                      |
| <b>Mex1-7</b>          | ACTCCAGAGAGAACTCGCCC       | ACGCTGTAATTGCCCTCATC                     |
| <b>Mex1-8b</b>         | TAAGTACTTCTGCCCGCCAC       | TGGCCTGTAGAATGCAAATG                     |
| <b>Mex2</b>            | CTGCCATCTGGACAAAAGATG      | CTCAAATCTCCCAAATCCAC                     |
| <b>Mex3</b>            | AAAAGGTGGGGGTCTCTTTC       | TCTTCAGATGTGGAAGACATGG                   |
| <b>Mex4</b>            | ATCCCCTGAAATCGAATGGT       | ACATCAGTTGGCTGTCCCTC                     |
| <b>Mex5</b>            | GGGTTATGCTGCTGTGTGTG       | TCAGAAAGATTAGTCCGTGTGAAA                 |
| <b>Mex6a</b>           | AGGGCCTGTGCCCTTATACT       | CCAGGTTTTTCAGGTGCAAT                     |
| 3'UTR                  | GGAGTGCCTGAATAGCTTGG       | GCATGGGCTGTTTTGAACTT                     |
| <b>cDNA analysis</b>   |                            |                                          |
| Mex1-8F                | CGTGACAGGAGGGGATTATA<br>CC | Mex 5-6B<br>TCAGAAAGATTAGTCCGTGTGAA<br>A |
| <b>qPCR</b>            |                            |                                          |
| TTNMex1                | AAGGCATGGGAGCAGTTCAT       | TTGCCACTGAAAGGAATCTTGA                   |
| P0                     | CTCCAAGCAGATGCAGCAGA       | ATAGCCTTGCGCATCATGGT                     |

**Supplemental Table e-2: Medical Research Council score**

| <b>Muscle</b>      | <b>Patient 1</b> | <b>Patient 2</b>  | <b>Patient 3</b> |
|--------------------|------------------|-------------------|------------------|
| Scapular girdle    | 2                | 2                 | 2+               |
| Biceps brachialis  | 3-               | 2 left, 2- right  | 3                |
| Triceps brachialis | 3+               |                   | 3-               |
| Wrists flexors     | 4+               | 4                 | 5                |
| Wrists extensors   | 3+               | 4                 | 4                |
| Finger extensors   | 3+               | 3+                | 3+               |
| Finger flexors     | 4+               | +2 left, 3 right  | 5-               |
|                    |                  |                   |                  |
| Hip adductors      | 1                | 0                 | 3-               |
| Psoas              | 2                | 0                 | 2                |
| Glutei             | 2                | 0                 | 1 (max) /2 (min) |
| Knee flexors       | 3-               | 0                 | 2+               |
| Knee extensors     | 3                | 2+ left, 2- right | 3 left, 3- right |
| Feet elevators     | 4+               | 1 left, 0 right   | 2                |
| Feet flexors       | 3+               | 2                 | 3-               |
|                    |                  |                   |                  |
| Neck flexors       | 5                | Not scored        | 2                |
| Neck extensors     | 5                | Not scored        | 4                |
| Abdominal muscles  | 1                | 1                 | 1                |

**Supplemental Table e-3: Details of the contracture presentation of the patients.** ND: not determined.

|                | <b>P1</b>                  | <b>P2</b>                                    | <b>P3</b>                     |
|----------------|----------------------------|----------------------------------------------|-------------------------------|
| <b>Jaw</b>     | ND                         | absent                                       | present                       |
| <b>Spine</b>   | Neck and spine were spared | Diffuse rigid spine including cervical spine | Rigid                         |
| <b>Elbow</b>   | -30°                       | -50°                                         | -60°                          |
| <b>Wrists</b>  | -10°                       | Present not scored                           | Extensors, -80°, flexors -60° |
| <b>Fingers</b> | Flexors                    | Flexors                                      | Flexors                       |
| <b>Hips</b>    | ND                         | Present but not scored                       | Abduction -60°                |
| <b>Knee</b>    | -50°                       | -20°                                         | -50°                          |
| <b>Ankle</b>   | -30°                       | -15°                                         | -5°                           |

**Supplemental Table e-4:** Molecular analysis performed in the patients. Only the WB blot for calpain 3 showed abnormality.

|           | Histo-immunofluorescence analyses                                                                                                                                   | Western blot             | DNA or RNA analysis                         |
|-----------|---------------------------------------------------------------------------------------------------------------------------------------------------------------------|--------------------------|---------------------------------------------|
| Patient 1 | emerin, collagen VI, dystrophin, $\alpha$ -sarcoglycan, $\beta$ sarcoglycan, $\gamma$ -sarcoglycan, $\delta$ -sarcoglycan, spectrin, laminin- $\alpha$ 2, dysferlin | collagen VI<br>calpain 3 | <i>CAPN3,FKRP, ANO5, LMNA, COL6A1, A2A3</i> |
| Patient 2 |                                                                                                                                                                     | calpain 3                | <i>LMNA, SEPNI</i>                          |
| Patient 3 | dystrophin, sarcoglycans, telethonin, $\alpha$ B-cristallin, desmin<br>dysferlin, $\alpha$ -dystroglycan, collagen VI                                               | calpain 3                | <i>CAPN3,LMNA ACTA1, TPM2 TPM3</i>          |

**Supplemental Figure e-1:** Chromatograms for the identified mutations of patient 1, patient 2 and patient 3 versus controls. The correspondences at genomic, coding and protein sequences are indicated bottom right.

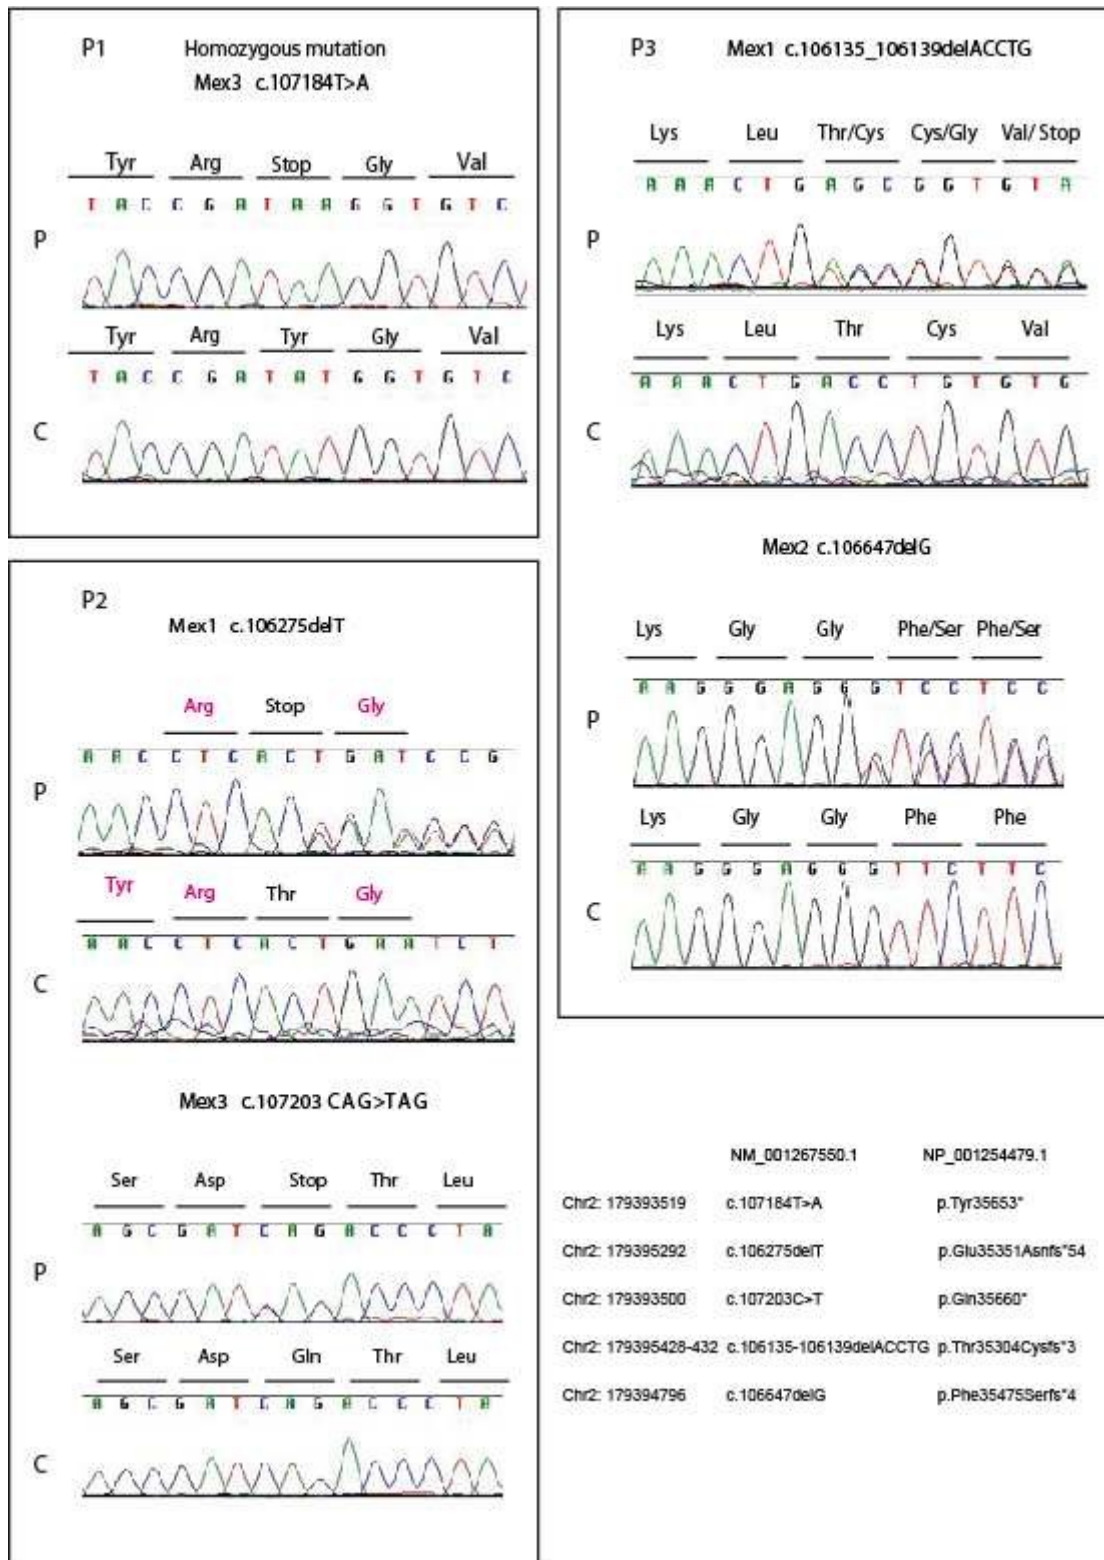

**Supplemental Figure e-2:** **A/** RT-PCR across Mex1 and Mex6 showed normal splicing of the region in the patients (P2 and P3). **B/** qRT-PCR using Mex1 primers showed decrease level of messenger probably due to NMD (expressed in  $2^{-\Delta\Delta Ct}$ ).

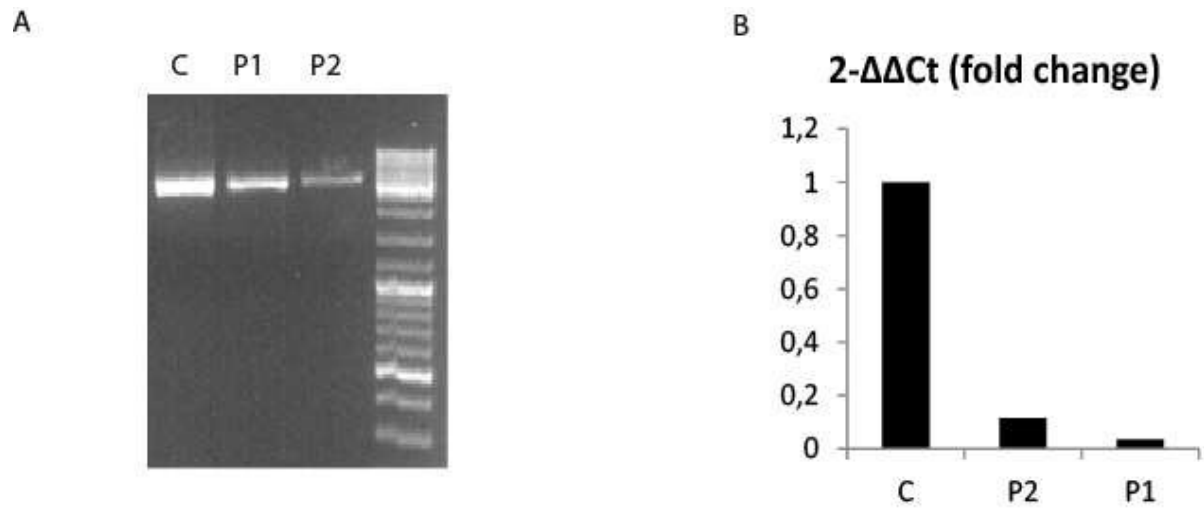

Supplement: supp_WNL.0000000000002200_Appendix_e-1.pdf [file supp_WNL.0000000000002200_Appendix_e-1.pdf]
